# Supplementary material for: Origin of enhanced thermoelectric properties of doped CrSi2
Source: Royal Society of Chemistry journal article supplement (doi:10.1039/c3ra44822c), 2013-10-23
Supplement: c3ra44822c.pdf [file c3ra44822c.pdf]

Supporting information for

## Origin of doping enhanced thermoelectric properties of CrSi<sub>2</sub>

Tribhuvan Pandey and Abhishek K. Singh

Material Research Centre, Indian Institute of Science, Bangalore-560012

### Table: - ST1

Formation energies of neutral defects:

| Dopants          | Formation energy (eV) | Reference Material | Doping % |
|------------------|-----------------------|--------------------|----------|
| Al <sub>Si</sub> | 0.17                  | Al bulk            | 4        |
| P <sub>Si</sub>  | 0.50                  | PH <sub>3</sub>    | 4        |
| V <sub>Cr</sub>  | 0.47                  | V bulk             | 4        |
| Mn <sub>Cr</sub> | 0.67                  | Mn bulk            | 4        |
| Fe <sub>Cr</sub> | 0.17                  | Fe Bulk            | 4        |

### Table: - ST2

DFT lattice parameters for the reference materials:

| Reference Material | DFT lattice parameter (Å) | Experimental lattice parameter (Å) |
|--------------------|---------------------------|------------------------------------|
| Al                 | 4.15                      | 4.05 <sup>[1]</sup>                |
| PH <sub>3</sub>    | 6.43                      | 6.31 <sup>[2]</sup>                |
| V                  | 2.97                      | 3.02 <sup>[3]</sup>                |
| Mn                 | 8.85                      | 8.91 <sup>[4]</sup>                |
| Fe                 | 3.48                      | 3.43 <sup>[5]</sup>                |
| Cr                 | 3.65                      | 3.60 <sup>[5]</sup>                |
| Si                 | 5.50                      | 5.43 <sup>[6]</sup>                |

### Table: - ST3

Defect transition level and corresponding activation temperature:

| Dopants          | Transition level (eV) | Activation temperature (K) | T <sub>m</sub> <sup>*</sup> (K) |
|------------------|-----------------------|----------------------------|---------------------------------|
| Al <sub>Si</sub> | 0.077 (From VBM)      | 900                        | 900                             |
| P <sub>Si</sub>  | 0.064 (From CBM)      | 750                        | 750                             |
| V <sub>Cr</sub>  | 0.069 (From VBM)      | 800                        | 800                             |

|                  |                  |     |     |
|------------------|------------------|-----|-----|
| Mn <sub>Cr</sub> | 0.077 (From CBM) | 900 | 900 |
| Fe <sub>Cr</sub> | 0.069 (From CBM) | 800 | 800 |

\*  $T_m$  is the temperature at which thermopower peaks. As shown in the table this temperature is closely related to the temperature which corresponds to position of defect transition level.

### Fig. S1-

The position of defect transition levels across the band gap for different dopants. The dopants and corresponding defect transition levels are denoted on the top of line.

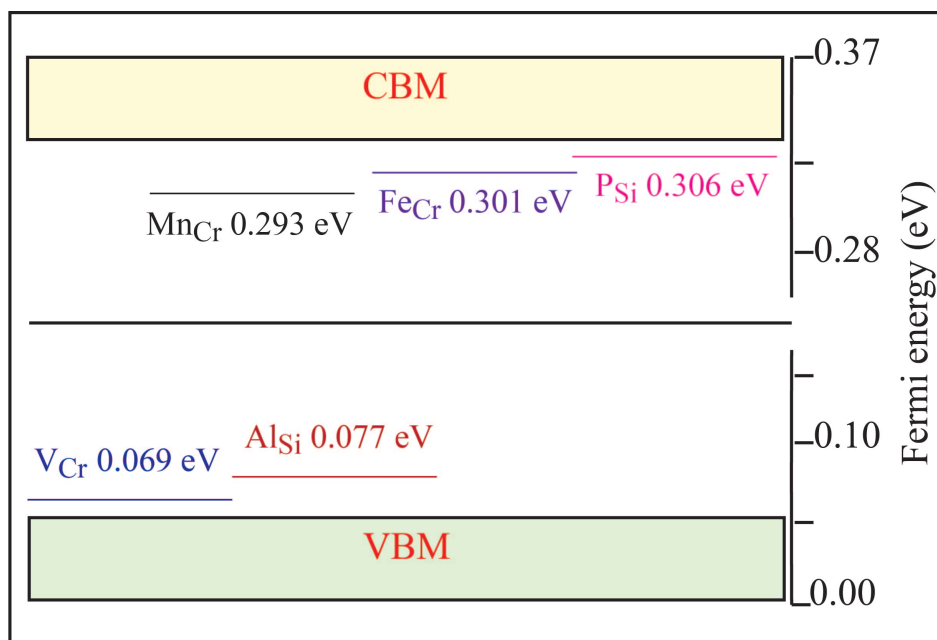

### Details of Rigid Band Model Approximation:

To compare with explicit doping results with RBA, we model same doping level under RBA. As explained the doping levels are used for explicit doping are 4%. A doping level 0.12 (n, p/unit cell) is used for Al, P, Mn and V cases. Since Fe doping donated 2 electrons to sample to match the carrier concentration accurately a doping level of 0.24 (n/unit cell) is used in Fe doped case. Since there are three formula units per cell, our assumed doping levels for these calculations give rise to same carrier concentrations.

- [1]- Cooper, A.S. *Acta Crystallographica* (1, 1948-23, 1967) (1962) 15, p578- p582
- [2]- Natta, G.; Casazza, E. *Gazzetta Chimica Italiana* (1930) 60, p851-p859
- [3]- Karen, P.; Suard, E.; Fauth, F. *Inorganic Chemistry* (2005) 44, (23) p8170-p8172
- [4]- Oberteuffer, J.A.; Ibers, J.A. *Acta Crystallographica B* (24, 1968-38, 1982) (1970) 26, p1499-  
p1504
- [5]- Haglund, J.; Fernandez Guillermet, F.; Grimvall, G.; Korling, M. *Physical Review, Series 3. B -  
Condensed Matter* (18, 1978- ) (1993) 48, p11685-p11691
- [6]- Toebbens, D.M.; Stuesser, N.; Knorr, K.; Mayer, H.M.; Lampert, G. *Materials Science Forum*  
(2001) 378, p288-p293
